# Supplementary material for: Improving American Healthcare Through “Clinical Lab 2.0”: A Project Santa Fe Report
Source: PubMed Central journal article supplement — Acad Pathol. 2017 Apr 18;4:2374289517701067. doi: 10.1177/2374289517701067 (PMC5497901; doi:10.1177/2374289517701067), 2017-04-18
Supplement: APC-16-0027.R1_Supplemental_Table_1.pdf [file APC-16-0027.R1_Supplemental_Table_1.pdf]

**Supplemental Table 1: Laboratory Leadership Examples**

| <b>Topic</b>                        | <b>Key citations</b> |
|-------------------------------------|----------------------|
| Patient safety                      | 11,12,48             |
| Laboratory quality improvement      | 13                   |
| Safety of electronic health records | 16                   |
| Laboratory clinical effectiveness   | 17                   |
| Laboratory utilization management   | 18-21,39,44,53       |
| Point-of-care testing               | 22                   |
| Chronic disease management          | 23                   |
| Disease management teams            | 8,9                  |
| Antibiotic stewardship              | 24-26                |
| Infectious diseases outbreaks       | 27,28                |
| Functional genomics                 | 29                   |
| Computational Pathology             | 30,31                |
| Machine learning                    | 32                   |
| Biobanking                          | 33                   |
| Cost effectiveness                  | 41,45,53             |
| Clinical Decision Support           | 37,54                |
| Secondary Use of Laboratory data    | 50-53                |
